# Supplementary material for: TBK1 Is a Synthetic Lethal Target in Cancer with VHL Loss
Source: Oxford University Press journal article supplement (doi:10.1158/2159-8290.cd-19-0837), 2019-12-06
Supplement: 21598290cd190837-sup-225993_2_supp_5932793_q1t7ph.xlsx [file 21598290cd190837-sup-225993_2_supp_5932793_q1t7ph.xlsx]

## Sheet: 18-pair cohort
	relative pTBK1/TBK1			relative p62
Sample	Normal	Tumor		Normal	Tumor
1	1.00023	27.8325		1	2.09982
2	1.00002	6.56782		0.999964	0.953906
3	0.999948	6.52422		1	2.11508
4	1.00171	5.44264		1.00002	1.72497
5	1.00003	2.8574		1.00005	1.63161
6	1.00002	2.6663		1.00006	1.82916
7	1.00007	1.96756		0.999971	1.14518
8	1.00059	1.90654		0.999966	2.06306
9	0.997579	1.68958		1.00004	1.11064
10	1.00008	1.57748		1.00006	0.810057
11	0.999877	1.27952		1.00004	0.740594
12	1.00003	1.25916		0.999938	0.888044
13	0.999992	1.16055		0.999951	0.207343
14	1.00063	1.0482		0.999969	1.5326
15	0.999961	0.73452		1.00001	2.56932
16	1.00073	0.732091		0.999991	1.03994
17	1.00013	0.603315		0.999983	0.371755
18	1.00012	0.277181		0.999935	1.0033

## Sheet: TMA1
	relative pTBK1/TBK1		relative p62
Sample	Normal	Tumor	Normal	Tumor
1	1.00005	156.948	1.00092	0.0419614
2	1.00003	69.754	0.999995	0.0599404
3	1.00021	44.1904	1	0.577778
4	0.999953	40.8376	0.99878	0.46451
5	0.996327	28.3261	1	0.571429
6	1.00032	25.2529	0.997763	1.50049
7	1.00008	24.6018	0.998982	0.218025
8	0.999993	21.0696	0.999709	4.97699
9	1.00019	19.8428	1	3.27941
10	0.999678	19.6678	1	1.11111
11	0.99971	17.7154	0.992473	0.0553857
12	1.00001	17.0109	0.998217	0.112612
13	0.999998	16.7105	0.990148	28.2524
14	0.999959	14.2176	0.999412	1.33854
15	0.999973	12.3219	1.00106	1.27408
16	1.00002	11.0889	1	182
17	0.999994	8.6276	0.995816	17.4326
18	1.00018	7.80606	1.00031	2.36246
19	1	7.00323	1.00021	1.59537
20	0.999988	5.7269	1.00061	2.45694
21	0.999968	5.43806	1.02346	18.3409
22	1.00007	5.0957	1.00121	2.94862
23	0.999975	5.02731	1.00044	0.196365
24	1.00005	4.30704	1.0001	0.586906
25	1.00004	3.89566	1.0004	0.339213
26	0.999982	3.02532	1	3.25
27	1.00017	2.84704	1	2.58667
28	1.00001	2.51744	1.00003	18.5161
29	1.00005	1.99972	0.998573	2.33218
30	1.00001	1.98184	0.987803	11.7608
31	1.00001	1.7381	1	8.5
32	0.999918	1.22203	1.00402	9.46643
33	1	0.818145	1.00013	0.767458
34	1.00012	0.752613	1	5.368
35	1.00001	0.692987	1.00044	3.40547
36	1.00001	0.685977	0.99998	0.888726
37	1.00006	0.511898	1.00007	0.326642
38	0.999999	0.445328	1.00007	0.160816
39	1.00007	0.434135	0.999108	8.72973
40	0.999989	0.355132	0.999466	0.255032
41	0.999999	0.26338	1	5.02817
42	1	0.106028	1	374.5
43	1.00001	0.0109569	1.03643	263.386
44	0.999792	0	1	0.796487
45	0.999931	0	1	2.83333

## Sheet: TMA2
	VHL		relative pTBK1/TBK1			relative p62
Sample	Normal	Tumor	Normal	Tumor		Normal	Tumor
1	108.852	0.55889	0.999958	723.183		1.00364	4.38201
2	151.647	24.8544	0.999792	279.297		1.00036	1.76224
3	117.332	11.7952	0.999966	253.222		0.998146	10.9501
4	131.82	40.005	1.00002	154.422		1.00177	8.27867
5	166.026	5.29925	0.999981	129.199		0.997276	10.4012
6	117.888	0.465116	0.999973	115.066		0.999979	0.0447882
7	94.0463	53.6276	1.0004	101.392		0.998592	8.29983
8	127.955	27.6241	1.00021	89.2286		0.999844	0.066076
9	47.6668	1.94229	1.00002	60.0548		0.997866	0.205711
10	72.8466	1.52831	0.999938	57.1075		1.00144	0.782354
11	58.7469	32.7581	1.00005	53.3733		1.01077	22.8873
12	123.88	0.291897	0.99999	52.6817		1.00078	3.77762
13	61.2482	0.280153	1.00001	51.012		0.99849	14.8992
14	59.0322	11.9861	0.999995	32.1402		0.999731	1.19385
15	36.8022	0.90937	1.00001	28.8808		0.99932	2.13576
16	108.852	11.3856	0.999998	27.8319		0.989773	14.0054
17	115.521	8.9784	1.00001	18.4449		0.998468	0.141835
18	136.865	0.290373	1	17.628		0.996489	18.3676
19	83.7904	13.5069	0.999943	13.5946		0.998485	1.08063
20	78.1835	22.637	1.00001	4.97813		0.999163	0.274108
21	60.8383	8.62634	0.999994	4.84181		1.00091	0.316274
22	72.2295	15.79	0.999924	4.26729		1.00048	4.8955
23	43.1105	1.52747	1.00002	4.0013		1.00011	0.30297
24	101.879	33.0419	0.999992	3.34092		1.00891	24.2132
25	114.152	5.71053	0.999986	3.08359		0.998242	0.951011
26	113.924	8.54315	1	2.65905		0.996132	10.5336
27	167.398	106.737	0.999996	2.26979		1.00033	3.5047
28	36.5618	22.4995	1.00001	2.06337		0.999937	0.0680337
29	129.191	28.3446	1	1.39793		1.0001	0.022033
30	132.797	92.2299	0.999998	0.993826		1.02485	16.2427
31	41.9228	4.68968	0.999971	0.828138		0.999794	4.27656
32	116.139	43.1015	1.00002	0.787289		0.999856	8.97593
33	38.3292	2.12986	0.999997	0.331724		1.00013	1.00995
34	175.91	15.4734	0.999999	0.0110517		0.999051	25.7342
35	14.696	2.7273	1.00001	0		1.00375	12.9592
36	110.005	1.72261	1	0		0.997389	1.065
37	23.7205	8.1725	0.999989	0		1.00106	0.384164
38	54.493	53.9736	1.00009	3.86847		1.00028	2.49279
39	3.02215	2.65189	1.00001	1.26597		0.999432	19.9783
40	29.5953	29.0338	0.999998	0.853541		1.0112	54.4708
41	16.0592	85.0062	0.999991	1.2784		0.999447	0.876557
42	36.9594	47.8085	0.999987	5.23986		0.997638	70.9751
43	29.2587	74.802	1	2.72727		1.01575	3.55017
44	10.9478	61.0497	1	0.638381		0.998634	16.6096
45	6.09964	36.0718	1	0		0.972117	29.4369
